# Supplementary material for: Testing the consistency between changes in simulated climate and Alpine glacier length over the past millennium
Source: Copernicus journal article supplement (doi:10.5194/cp-2018-48), 2018-05-04
Supplement: Supplementary file 1 [file cp-2018-48-supplement.pdf]

# Testing the consistency between changes in simulated climate and Alpine glacier length over the past millennium

Hugues Goosse<sup>1</sup>, Pierre-Yves Barriat<sup>1</sup>, Quentin Dalaiden<sup>1</sup>, François Klein<sup>1</sup>, Ben Marzeion<sup>2</sup>, Fabien Maussion<sup>3</sup>, Paolo Pelucchi<sup>4</sup>, Anouk Vlug<sup>5</sup>

<sup>1</sup>Earth and Life Institute, Université catholique de Louvain, Louvain-la-Neuve, Belgium

<sup>2</sup>Institut für Geographie, Universität Bremen, Bremen, Germany

<sup>3</sup>Department of Atmospheric and Cryospheric Sciences, Universität Innsbruck, Innsbruck, Austria

<sup>4</sup>Imperial College, London, United Kingdom

<sup>5</sup>Institute of Geography and MARUM, University of Bremen, Bremen, Germany

Correspondence to: Hugues Goosse ([hugues.goosse@uclouvain.be](mailto:hugues.goosse@uclouvain.be))

## SUPPLEMENTARY MATERIAL

Table S1: Names and position of the selected glaciers, following Leclercq et al. (2014), and corresponding RGI index (RGI Consortium, 2015)

| NAME        | Lon   | Lat   | RGI            |
|-------------|-------|-------|----------------|
| Allalin     | 7.93  | 46.05 | RGI50-11.02715 |
| Alpeiner    | 11.13 | 47.05 | RGI50-1.00376  |
| Argentiere  | 6.93  | 45.97 | RGI50-11.02835 |
| Bachfall    | 11.08 | 47.08 | RGI50-11.00325 |
| Basodino    | 8.47  | 46.42 | RGI50-11.01987 |
| Berglas     | 11.12 | 47.07 | RGI50-1.00343  |
| Bluemlisalp | 7.77  | 46.5  | RGI50-11.01621 |
| Bossons     | 6.78  | 45.87 | RGI50-1.03067  |
| Brunni      | 8.78  | 46.73 | RGI50-11.01120 |
| Daunkogel   | 11.1  | 47.0  | RGI50-11.00518 |
| Diem        | 10.95 | 46.82 | RGI50-11.00886 |
| Dorfer      | 12.33 | 47.1  | RGI50-11.00164 |
| E. Gruebl   | 11.23 | 46.98 | RGI50-11.00577 |
| Fee         | 7.88  | 46.08 | RGI50-11.02607 |
| Ferpecle    | 7.58  | 46.02 | RGI50-1.02728  |
| Fiescher    | 8.15  | 46.05 | RGI50-1.01478  |
| Forni       | 10.57 | 46.4  | RGI50-11.01974 |
| Forno       | 9.7   | 46.3  | RGI50-11.02245 |
| Gaissberg   | 11.07 | 46.83 | RGI50-11.00836 |
| Gepatsch    | 10.77 | 46.85 | RGI50-11.00746 |
| Gorner      | 7.8   | 45.97 | RGI50-11.02848 |
| Gr Aletsch  | 8.03  | 46.5  | RGI50-11.01450 |
| Gries       | 8.33  | 46.43 | RGI50-11.01876 |
| Grosselend  | 13.32 | 47.03 | RGI50-11.00291 |
| Gurgler     | 10.98 | 46.8  | RGI50-11.00887 |

|                |       |       |                |
|----------------|-------|-------|----------------|
| Hallstaetter   | 13.62 | 47.48 | RGI50-11.00002 |
| ,Hintereis     | 10.77 | 46.8  | RGI50-11.00897 |
| Horn           | 11.82 | 47.0  | RGI50-11.00459 |
| Hufi           | 8.85  | 46.82 | RGI50-11.00872 |
| Karlinger      | 12.7  | 47.13 | RGI50-11.00067 |
| Kehlen         | 8.42  | 46.68 | RGI50-11.01193 |
| Kleinlend      | 13.25 | 47.07 | RGI50-11.00181 |
| Krimmler       | 12.25 | 47.08 | RGI50-11.00233 |
| La Mare        | 10.6  | 46.43 | RGI50-11.01863 |
| Langgletscher  | 7.93  | 46.47 | RGI50-11.01698 |
| Langtaler,     | 11.02 | 46.8  | RGI50-11.00929 |
| Marzell        | 10.88 | 46.78 | RGI50-11.00958 |
| Mer de Glace   | 6.93  | 45.88 | RGI50-11.02923 |
| Morteratsch    | 9.93  | 46.4  | RGI50-11.01946 |
| Niederjoch     | 10.87 | 46.78 | RGI50-11.00992 |
| Ob Grindelwald | 8.1   | 46.62 | RGI50-11.01270 |
| Oedenwinkel    | 12.65 | 47.12 | RGI50-11.00124 |
| Palue          | 9.98  | 46.37 | RGI50-11.02144 |
| Pasterze       | 12.7  | 47.1  | RGI50-1.00106  |
| Pizol          | 9.38  | 46.95 | RGI50-11.00638 |
| Pre de Bard    | 7.04  | 45.91 | RGI50-11.02967 |
| Rhone          | 8.4   | 46.62 | RGI50-11.01238 |
| Roseg          | 9.83  | 46.38 | RGI50-11.02119 |
| Rosenlauri     | 8.15  | 46.65 | RGI50-11.01222 |
| Rotmoos        | 11.05 | 46.82 | RGI50-11.00871 |
| Saint Sorlin   | 6.17  | 45.18 | RGI50-11.03503 |
| Saleina        | 7.07  | 45.98 | RGI50-1.02815  |
| Schwarzenstein | 11.85 | 47.02 | RGI50-11.00415 |
| Simony         | 12.27 | 47.07 | RGI50-11.00264 |
| Stein          | 8.43  | 46.7  | RGI50-11.01144 |
| Sulzenau       | 11.15 | 46.98 | RGI50-11.00541 |
| Taschach       | 10.87 | 46.9  | RGI50-11.00687 |
| Trient         | 7.03  | 46.0  | RGI50-11.02756 |
| Tsanfleuron    | 7.23  | 46.32 | RGI50-11.02249 |
| Tsidjore Nouve | 7.45  | 46.0  | RGI50-11.02771 |
| Turtmann       | 7.68  | 46.13 | RGI50-11.02490 |
| U Grindelwald  | 8.07  | 46.58 | RGI50-11.01346 |
| Umbal          | 12.25 | 47.05 | RGI50-11.00278 |
| Unteraar       | 8.22  | 46.57 | RGI50-11.01328 |
| Untersulzbach  | 12.35 | 47.13 | RGI50-11.00068 |
| Valsorey       | 7.27  | 45.9  | RGI50-1.02979  |
| Ventina        | 9.77  | 46.27 | RGI50-11.02351 |
| Viltragen      | 12.37 | 47.13 | RGI50-11.00110 |
| Waxegg         | 11.8  | 47.0  | RGI50-1.00469  |
| Zettalunitz    | 12.38 | 47.08 | RGI50-11.00190 |
| Zinal          | 7.63  | 46.07 | RGI50-11.02641 |

17

18

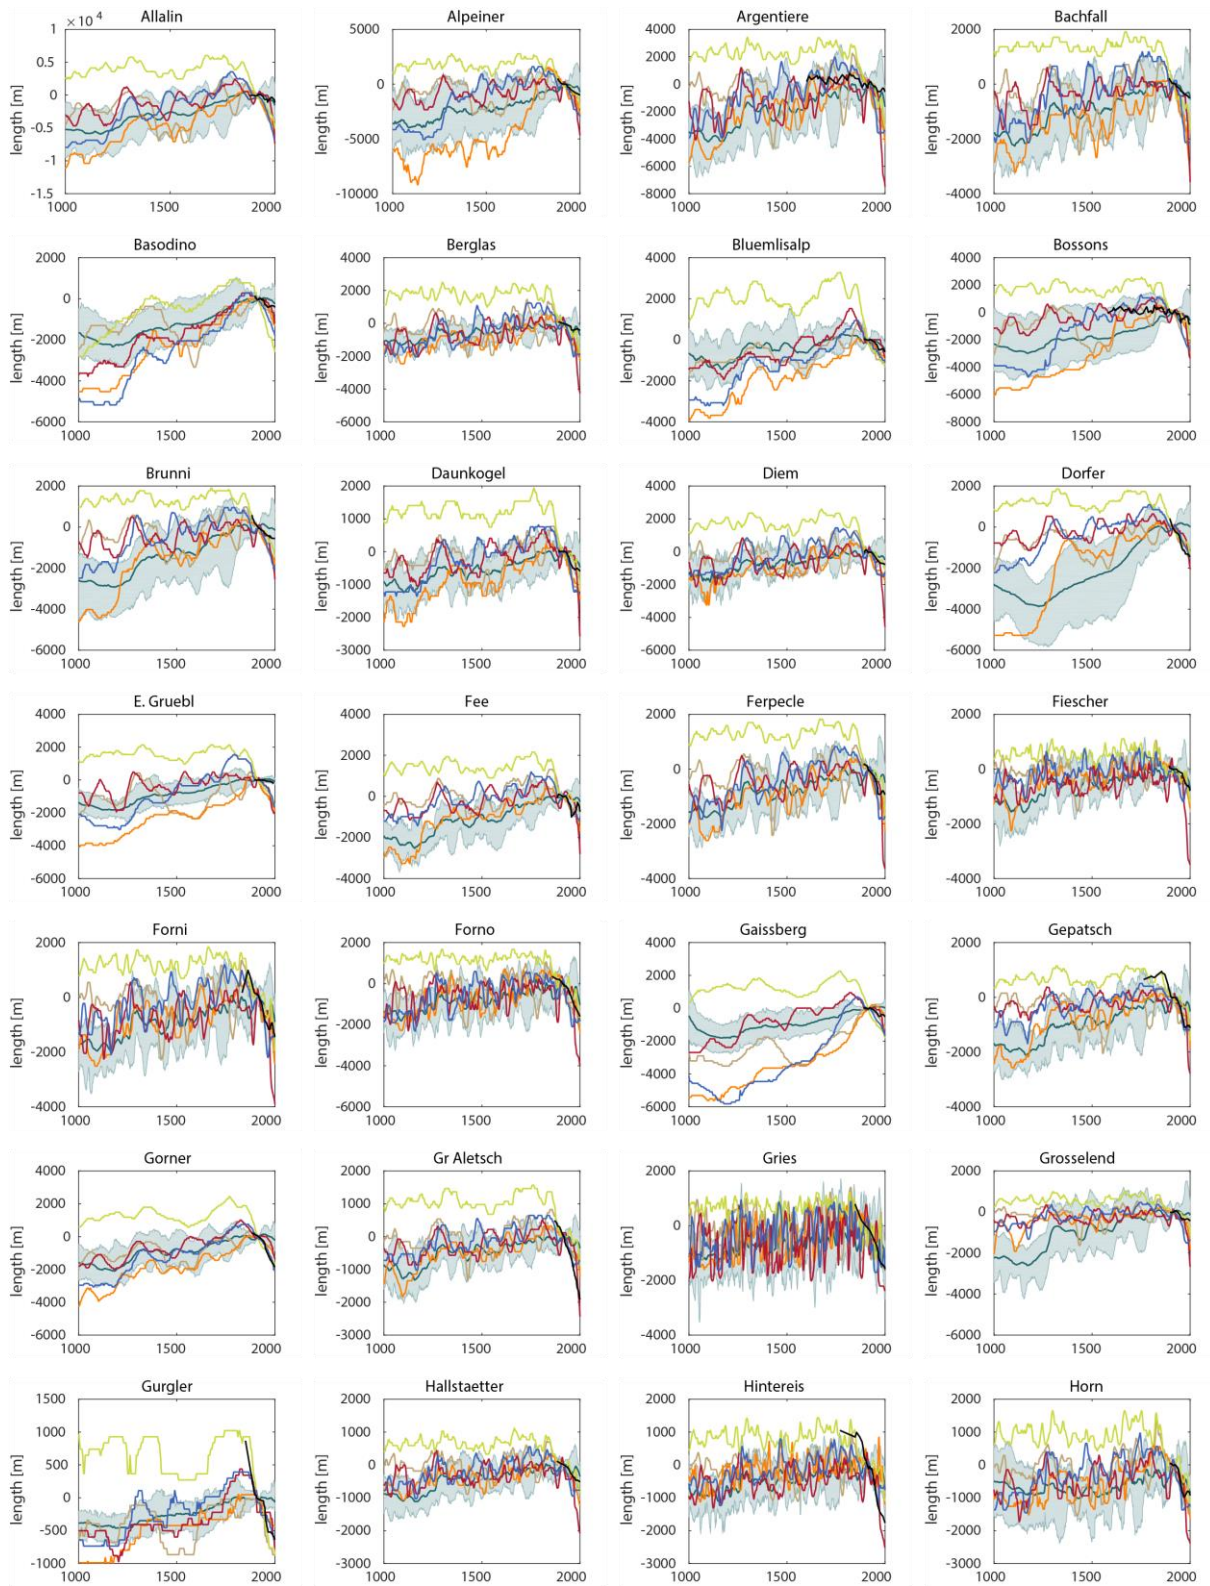

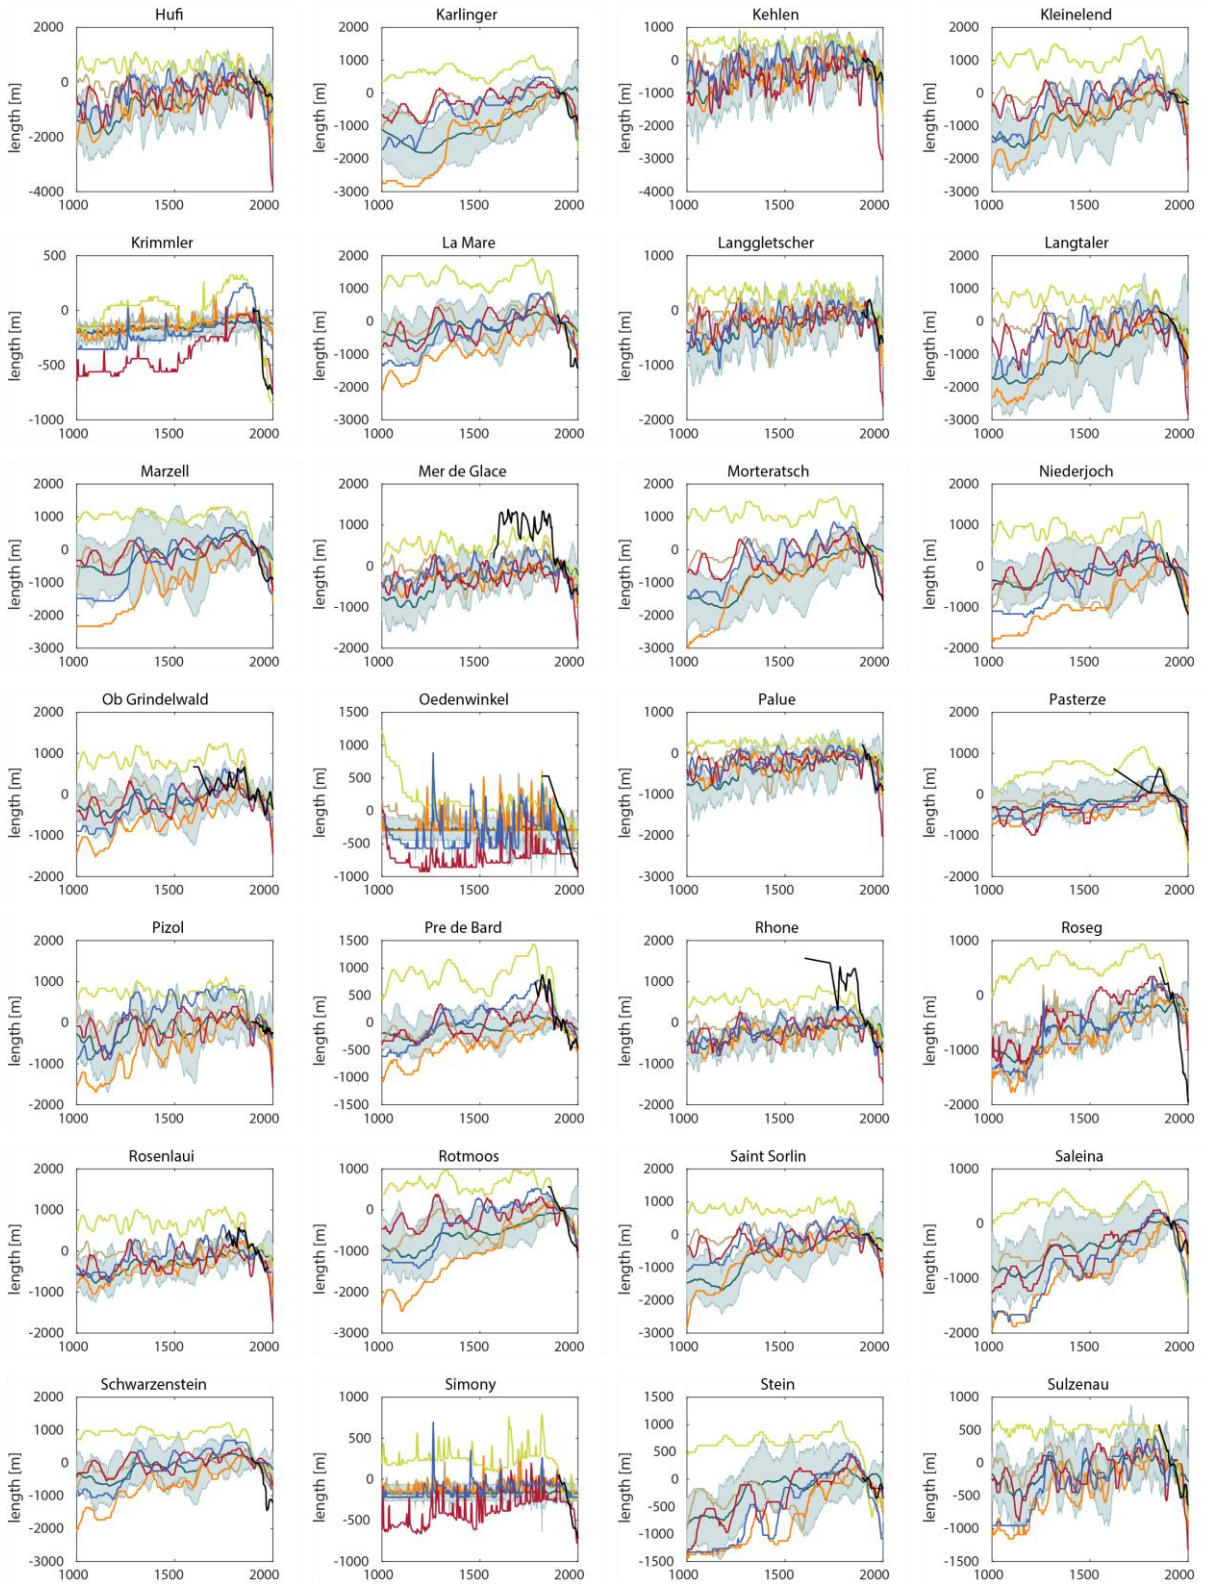

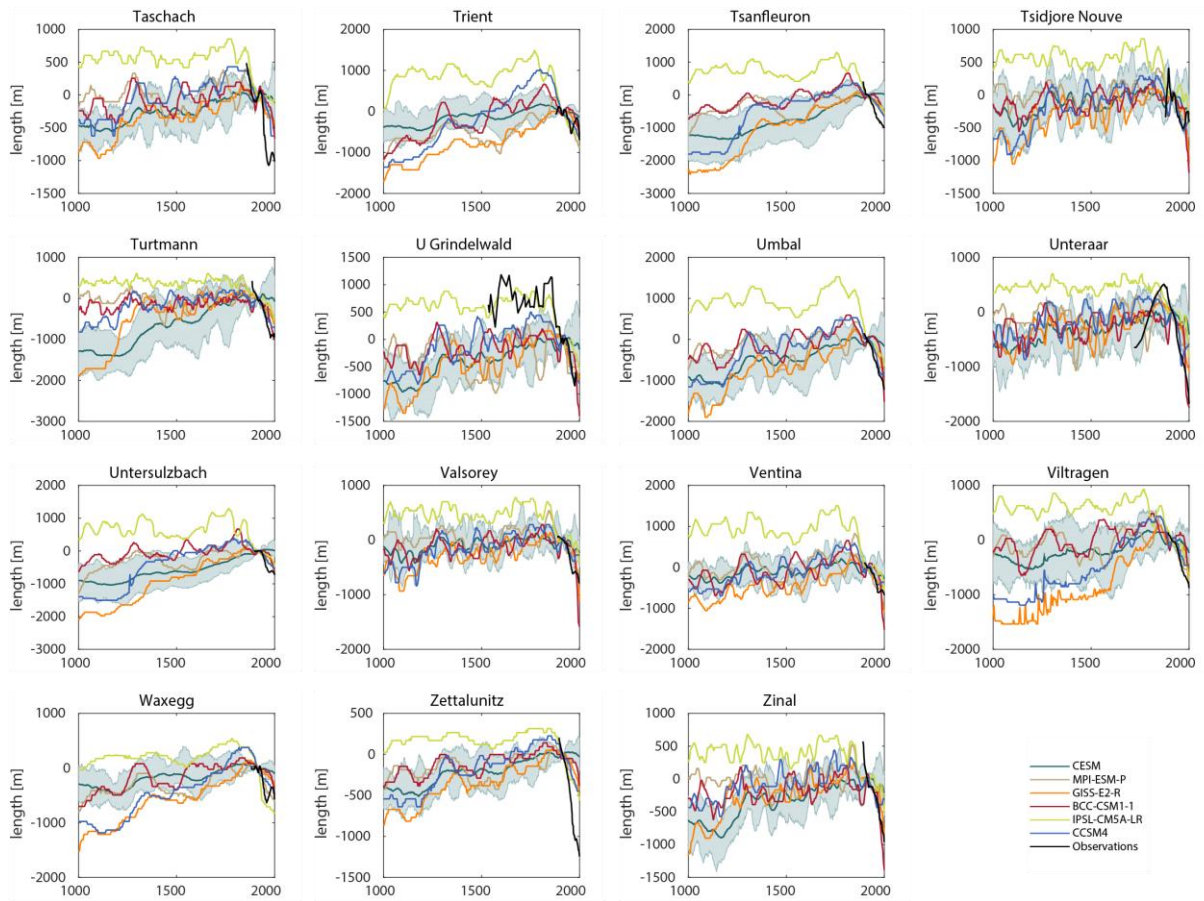

21

22

23 Supplementary Figure 1. Observed and simulated length for the 71 glaciers. The shaded area  
 24 represents the range of the ensemble of simulations driven by CESM outputs.

25

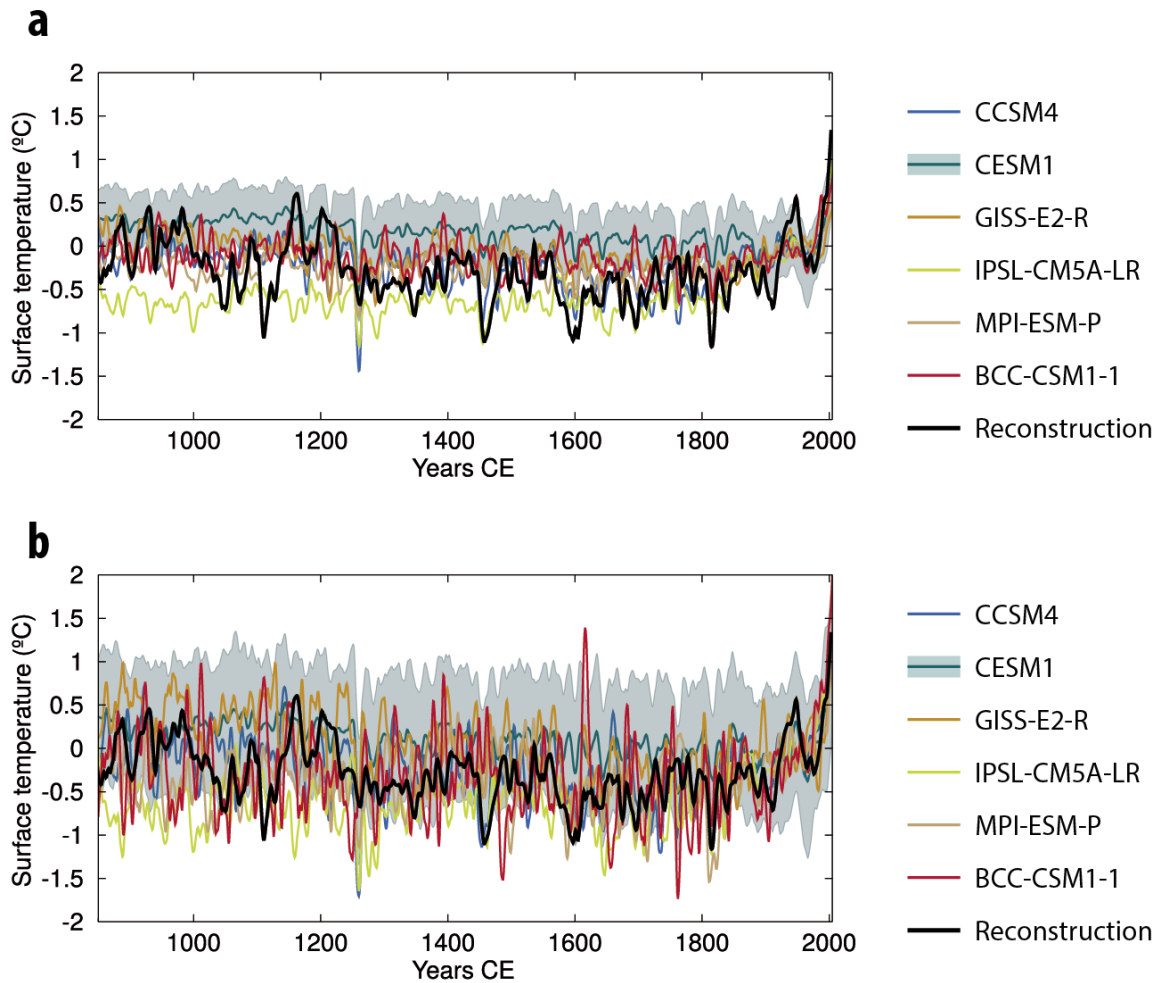

26

27 Supplementary Figure 2. Summer temperature overaged over a) Europe and b) the Alpine  
 28 region (defined here as the area between 45 and 48°N and between 6 and 13°E) in the  
 29 reconstruction of Luterbacher et al. (2016) and as simulated by climate models over the past  
 30 millennium. The shaded area represents the mean plus and minus one standard deviation of  
 31 the CESM1 model ensemble. A 15-year Lowess smoothing has been applied to the time  
 32 series. The reference period is the years 1900-2000, in contrast with Figure 1 that used the  
 33 years 1500-1850 CE.

34
